# Supplementary material for: Long-term live imaging provides new insight into stem cell regulation and germline-soma coordination in the Drosophila ovary
Source: Oxford University Press journal article supplement (doi:10.1242/dev.065508), 2011-05-10
Supplement: dev065508tables2.pdf [file dev065508tables2.pdf]

**Table S2. Escort cells divide infrequently**

| Cell cycle marker | Frequency in escort cells (%) | Frequency in escort cells after 7 days of <i>upd</i> expression (%) | Frequency in CPCs of the testis (%) |
|-------------------|-------------------------------|---------------------------------------------------------------------|-------------------------------------|
| Phosphohistone H3 | 0                             | 12                                                                  | 26                                  |
| EdU               | 0.5                           | —                                                                   | —                                   |

No mitotic escort cells were found in over 1000 wild-type germaria by staining for phosphohistone H3 and only two escort cells in 400 wild-type germaria were in S phase as determined by a 1-hour incubation with EdU. However, when germline cyst number was increased by overexpression of *upd* for 7 days, 12% of germaria now had a mitotic escort cell. CPCs of the *Drosophila* testis are an analogous cell population to escort cells of the *Drosophila* ovary; however, unlike escort cells, mitotic CPCs are readily detected.
